# Supplementary material for: The arrhythmogenic cardiotoxicity of the quinoline and structurally related antimalarial drugs: a systematic review
Source: BMC Med. 2018 Nov 7;16:200. doi: 10.1186/s12916-018-1188-2 (PMC6220451; doi:10.1186/s12916-018-1188-2)

**Additional file 11** Risk of bias for each criterion per drug

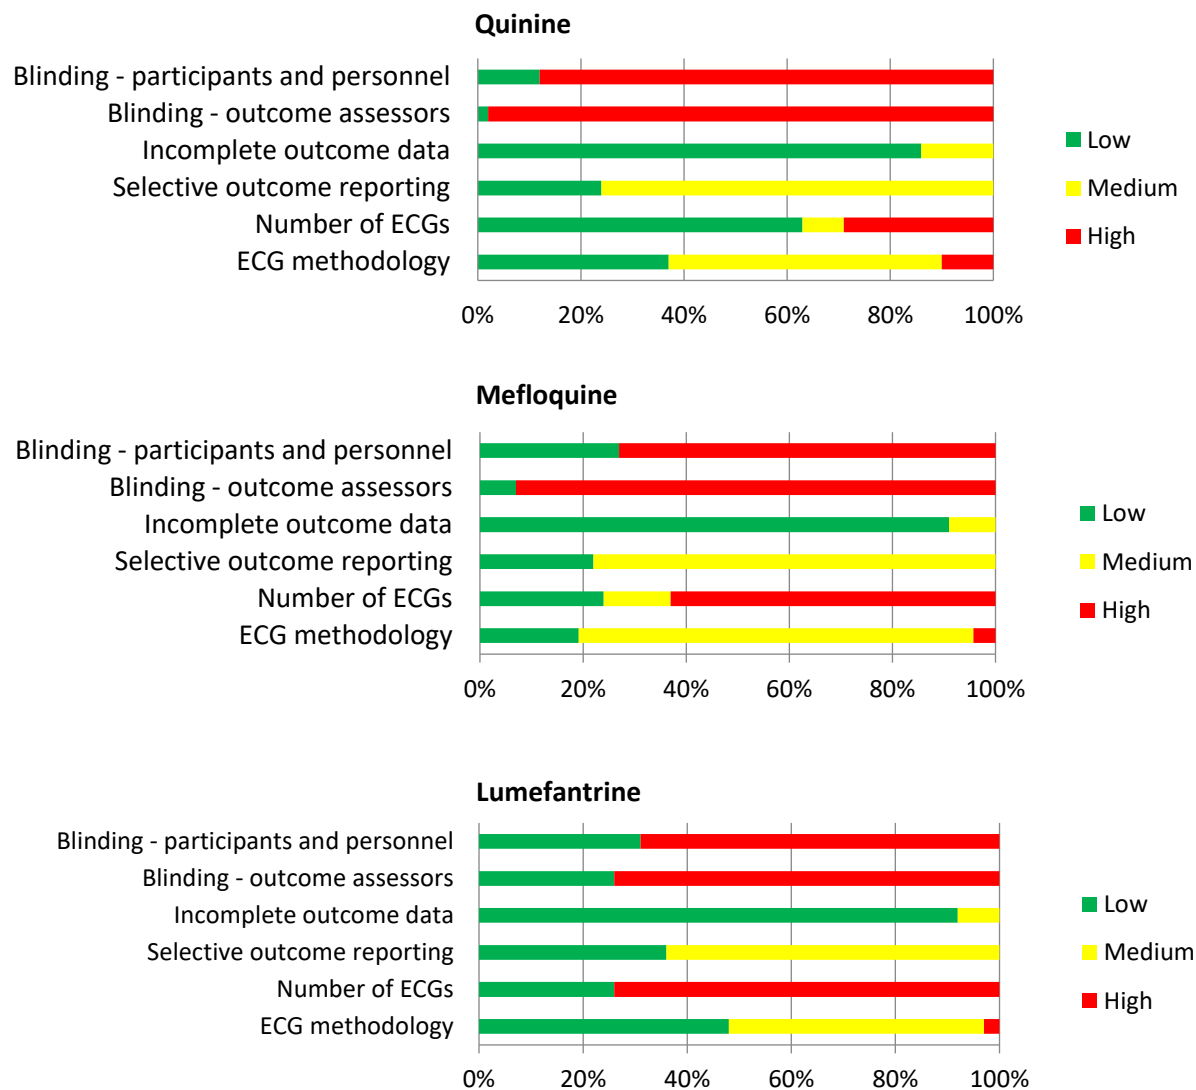

### Piperaquine

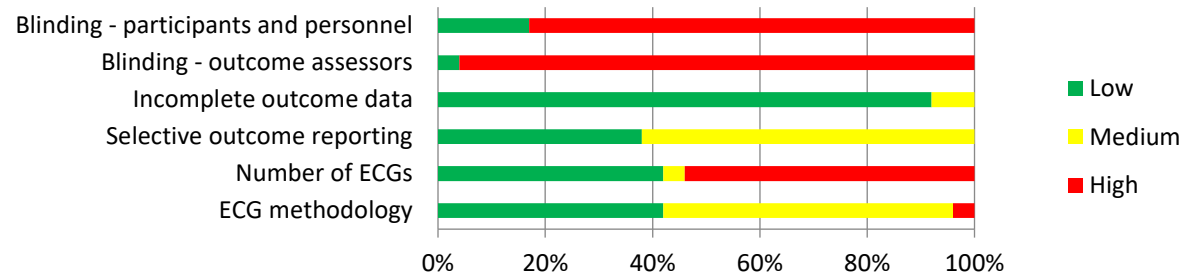

### Halofantrine

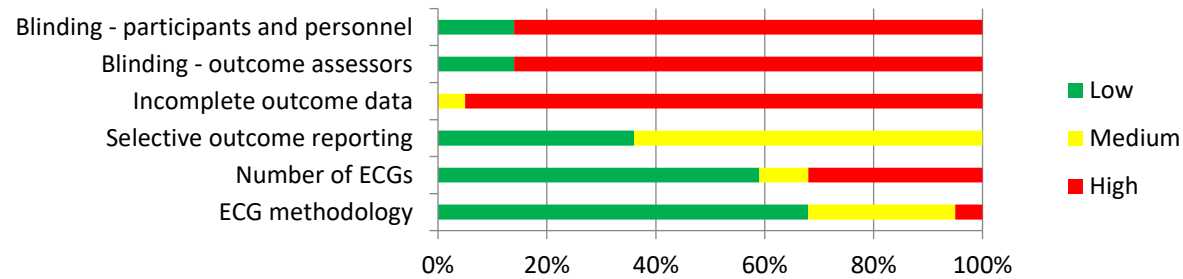

### Chloroquine

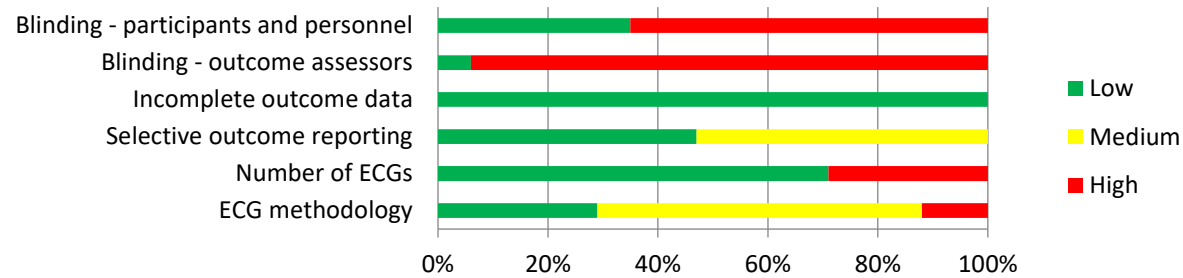

### Sulfadoxine-pyrimethamine

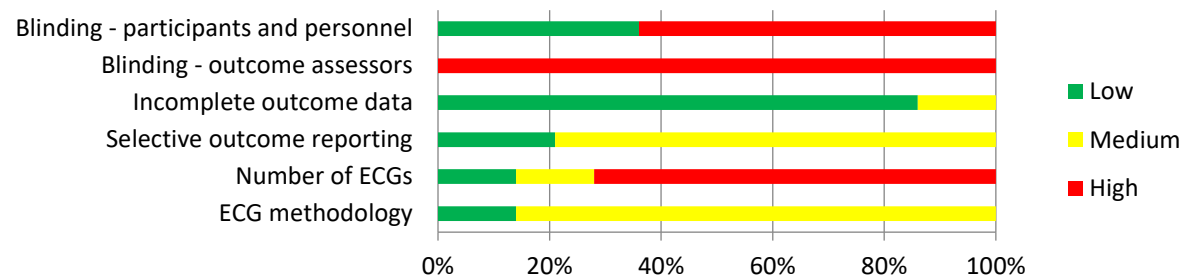

### Amodiaquine

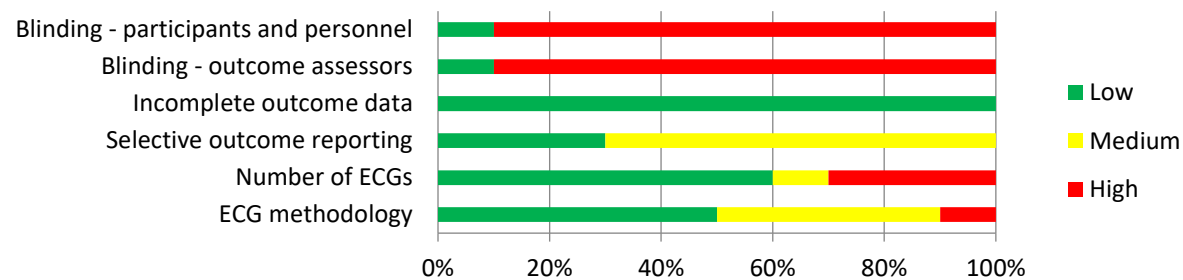

### Primaquine

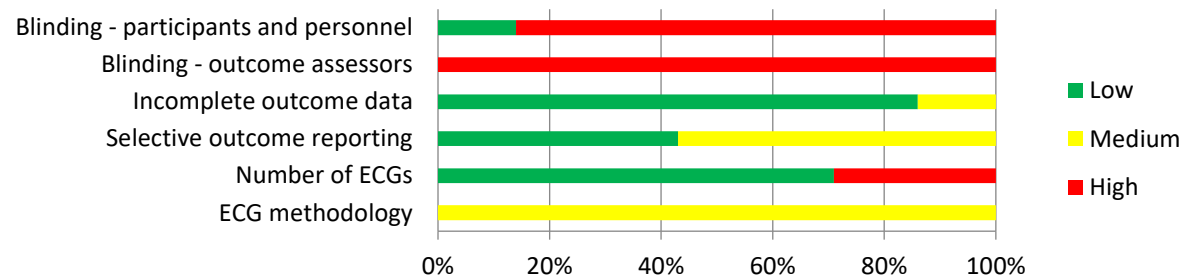

Supplement: Supplementary file 11 — Risk of bias for each criterion per drug. (PDF 621 kb) [file 12916_2018_1188_MOESM11_ESM.pdf]
